# Supplementary figures and images for: The contribution of friction to electrorheological properties of a chrysanthemum-like particle suspension
Source: Royal Society of Chemistry journal article supplement (doi:10.1039/c5ra13185e), 2015-01-01

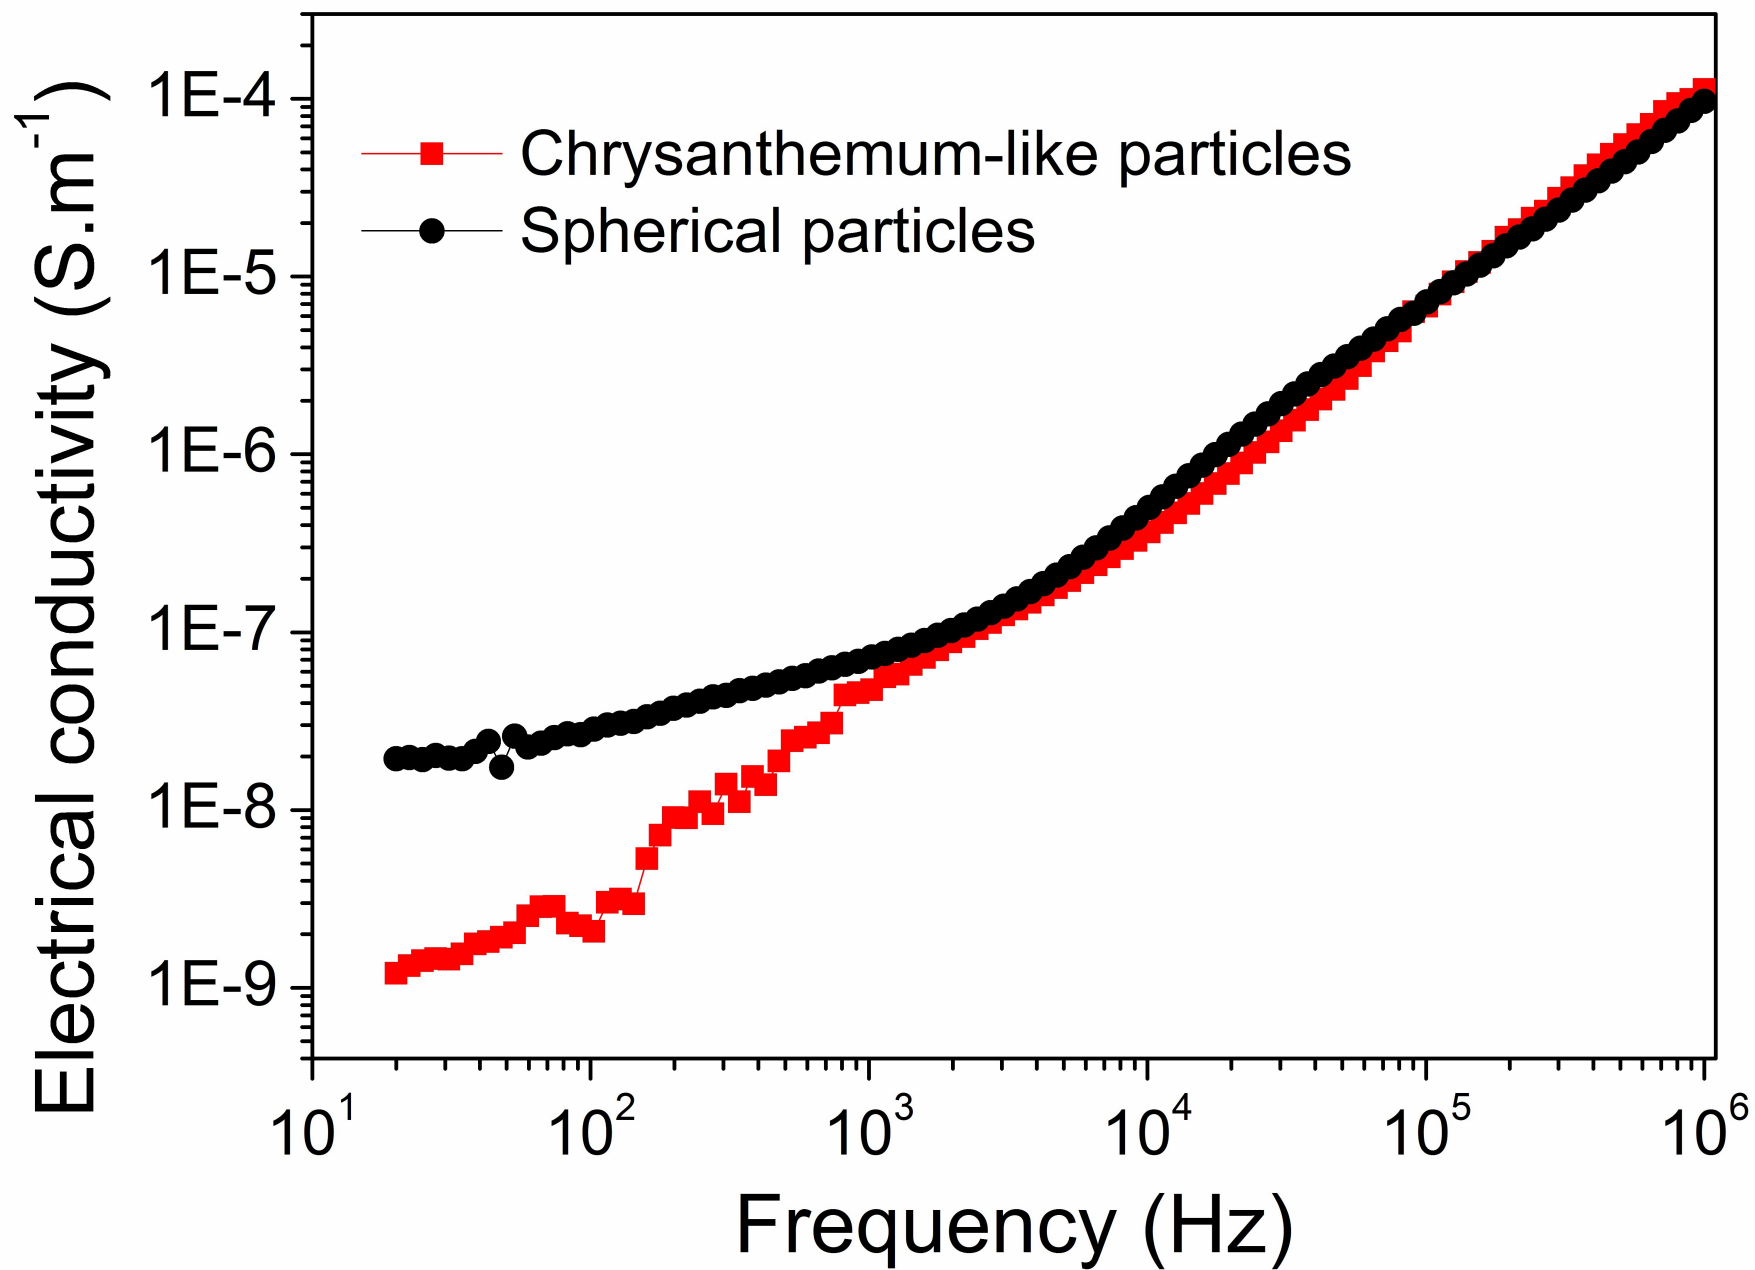

Supplement: c5ra13185e2.pdf [file c5ra13185e2.pdf]
